# Supplementary material for: Proteomic profile of 4-PBA treated human neuronal cells during ER stress
Source: Royal Society of Chemistry journal article supplement (doi:10.1039/c7mo00114b), 2018-01-19
Supplement: c7mo00114b1.pdf [file c7mo00114b1.pdf]

**Supplementary figure 1**

iTRAQ tags used for labeling proteins of different groups in different biological replicates.

**Supplementary figure 2**

Average relative expression of GRP78 in different treatment conditions (Tm,4-PBA and 4-PBA +Tm) with respect to control in iTRAQ and Western blotting across three biological replicates.

**Supplementary table 1**

Proteins identified by iTRAQ in all the biological replicates and their relative expression in different experimental group.

**Supplementary table 2**

List of Tm induced differentially expressed proteins, which are enriched in various biological process and cellular compartment.
